# Supplementary material for: Akting up in the GABA hypothesis of schizophrenia: Akt1 deficiency modulates GABAergic functions and hippocampus-dependent functions
Source: PubMed Central journal article supplement (PMC5018883; doi:10.1038/srep33095), 2016-09-12
Supplement: srep33095-s1.pdf [file srep33095-s1.pdf]

1 **Supplementary Methods and Supplementary Figures:**

2 MS Title: Akting up in the GABA hypothesis of schizophrenia: Akt1 deficiency

3 modulates GABAergic functions and hippocampus-dependent functions

4

5 Author List: Chia-Yuan Chang <sup>1</sup>, Yi-Wen Chen <sup>1</sup>, Tsu-Wei Wang <sup>2</sup>, Wen-Sung Lai <sup>1, 3, 4</sup>

6 <sup>1</sup> Department of Psychology, National Taiwan University, Taipei, Taiwan

7 <sup>2</sup> Department of Life Science, National Taiwan Normal University, Taipei, Taiwan

8 <sup>3</sup> Graduate Institute of Brain and Mind Sciences, National Taiwan University, Taipei,

9 Taiwan

10 <sup>4</sup> Neurobiology and Cognitive Science Center, National Taiwan University, Taipei,

11 Taiwan

12

13 **Supplementary Methods**

14 **Animals:**

15 All *Akt1*<sup>-/-</sup> and WT mice used in this study were generated from *Akt1*<sup>+/-</sup> breeding

16 pairs in the C57BL/6 genetic background (backcrossed for more than 10 generations)

17 and were genotyped via PCR analysis of mouse-tail DNA, as described previously<sup>1-3</sup>.

18 After weaning, animals were housed in ventilated polysulfone cages (Alternative

19 Design Manufacturing & Supply, Arkansas, AR, U.S.A.) within the animal rooms of

20 the Psychology Department, National Taiwan University, and provided with food and  
21 water *ad libitum*. All animals were 2–3 months old at the beginning of the experiments.  
22 Animals were handled and weighed daily beginning at least 1 week before the  
23 behavioural experiments. All animal procedures were performed according to protocols  
24 approved by the appropriate Animal Care and Use Committees established by National  
25 Taiwan University. The minimum number of mice was used in accordance with the 3R  
26 principle of animal use. Adequate measures were taken to minimize potential pain or  
27 discomfort experienced by the mice used in this study.

28

29 **Experiment 1: The effect of an Akt inhibitor on neuronal differentiation and the**  
30 **abundance of GABAergic neuron-like cells from P19 cells**

31 For neuronal differentiation, P19 mouse embryonal carcinoma cells were further  
32 split 16 hours after transfection into dishes coated with 2 µg/ml mouse natural laminin  
33 (Invitrogen, Carlsbad, CA, U.S.A.) and cultured in Opti-MEM1 medium supplemented  
34 with 1% FBS. P19 cells were transfected with US2-Ascl1 to induce neuronal  
35 differentiation, as described elsewhere<sup>4</sup>. The Akt1/2 inhibitor (1 µM, Calbiochem, San  
36 Diego, CA, U.S.A.) was mixed into the medium during DIV 0-5. To measure the  
37 differentiation of GABAergic neuron-like cells from P19 cells, the P19 cells were  
38 transfected with 0.5 µg of US2-GFP (control plasmid for transfection) and 0.5 µg of

39 US2-Ascl1 (inducer of neuronal differentiation). To examine the expression of  
40 GABAergic neuronal markers, immunocytochemistry was performed at DIV 5 to label  
41 transfected cells (anti-GFP antibody; 1:2000, Molecular Probes, Eugene, OR, U.S.A.),  
42 differentiated neurons (anti-Tuj1 antibody; 1:1000, Covance Inc., Princeton, NJ,  
43 U.S.A.), and GABAergic interneurons (anti-GAD67 antibody; 1:500, EMD Millipore,  
44 Billerica, MA, U.S.A.). We also evaluated the two major subtypes of GABAergic  
45 interneurons using antibodies against calretinin (1:2000, EMD Millipore) and  
46 parvalbumin (1:1500, Sigma-Aldrich Co., St. Louis, MO, U.S.A.). The cells were first  
47 fixed in 4% paraformaldehyde (PFA) and washed with PBS containing 0.2% Triton  
48 (PBT). Then, the cells were incubated overnight at 4 °C with primary antibodies diluted  
49 in 5% goat serum and 0.5% Triton in PBS. After washing, the cells were incubated with  
50 secondary antibodies at room temperature for 2 hours. Neuronal density was quantified  
51 using ImageJ software (NIH, Bethesda, MD, U.S.A.). Microscopic images of stained  
52 neurons were obtained using 20x and 40x objectives on a Nikon Eclipse 80i microscope  
53 (Nikon, Tokyo, Japan) with Image-Pro Plus v7.0 software (Media Cybernetics,  
54 Rockville, MD, U.S.A.). The percentages of differentiated neuron-like cells,  
55 GABAergic neuron-like cells, and parvalbumin-positive neuron-like cells among all  
56 P19-derived cells are shown as the percentages of GFP-positive cells that were also  
57 positive for Tuj1, GAD67, or parvalbumin, respectively.

58           Regarding functional GABA<sub>A</sub>R expression, previous studies have reported that all  
59 functional GABA<sub>A</sub>Rs require a  $\beta$  subunit<sup>5</sup> and that the phosphorylation of the GABA<sub>A</sub>R  
60  $\beta$ 2 subunit via Akt plays a crucial role in the efficacy of GABA<sub>A</sub>R-mediated synaptic  
61 inhibition both *in vitro* and *in vivo*<sup>6</sup>. P19 cells were first transfected with 1.25  $\mu$ g of  
62 US2-puromycin (for selection of transfected cells) and 1.25  $\mu$ g of US2-Ascl1.  
63 Transfected cells were selected using 15  $\mu$ g/ml puromycin. Next, the cells were washed  
64 twice with PBS and lysed with a commercial permeabilization buffer (ProteoJET™  
65 Membrane Protein Extraction Kit, K0321, Fermentas, Waltham, MA, U.S.A.)  
66 containing Protease Inhibitor Cocktail tablets (Roche, Basel, Switzerland) and  
67 Phosphatase Inhibitor Cocktail 1 (Sigma-Aldrich). Then, the mixture was incubated for  
68 10 min at 4 °C with continuous rocking. Afterwards, the mixture was centrifuged at  
69 16,000 g at 4 °C for 15 min. The supernatant, containing cytoplasmic proteins, was  
70 carefully collected for subsequent analysis. The cell debris was placed on ice, and  
71 commercial membrane protein extraction buffer was added. The debris was  
72 homogenized, and the mixture was then shaken at 1400 rpm for 30 min at 4 °C.  
73 Afterwards, the mixture was centrifuged at 16,000 g at 4 °C for 15 min. The supernatant  
74 was collected, and the protein concentration was measured using the Bradford protein  
75 assay (Bio-Rad Laboratories, Tokyo, Japan) via spectrometry at 620 nm. Protein  
76 samples were separated via sodium dodecyl sulfate-polyacrylamide gel electrophoresis

77 (SDS-PAGE) on 10% polyacrylamide gels and transferred onto nitrocellulose  
78 membranes (EMD Millipore). A mouse anti- $\beta 2$  GABA<sub>A</sub>R subunit antibody (1:1000,  
79 EMD Millipore) was used as the primary antibody, and a rabbit anti-Na<sup>+</sup>/K<sup>+</sup> ATPase  
80 antibody (1:1000, Cell Signaling Technology, Danvers, MA, U.S.A.) was used as the  
81 loading control of membrane protein. Appropriate HRP-conjugated antibodies were  
82 used as secondary antibodies. Bound antibody was detected using an enhanced  
83 chemiluminescence kit (EMD Millipore) and blue sensitive universal film (Fujifilm,  
84 Tokyo, Japan). Densitometric analysis was performed using NIH ImageJ software.

85

86 **Experiment 3: Examination of the numbers of GABAergic interneurons and of**  
87 **GABA<sub>A</sub>R expression in the brains of female *Akt1*<sup>-/-</sup> mice and female WT**  
88 **littermate controls.**

89 Because GABA is mediates pre- and post-synaptic inhibition of neuronal activity,  
90 two sub-experiments were designed to examine the numbers of GABAergic  
91 interneurons and the expression of GABA<sub>A</sub>Rs in the target brain regions of female mice  
92 based on the results of Experiments 1 and 2.

93 ***Experiment 3a: Examination of the expression of GABAergic interneurons in***  
94 ***the brains of female mice.*** Animals were perfused with 0.1% saline followed by 4%  
95 PFA. The mouse brains were serially sectioned using a cryostat (HM-520, Thermo

96 Scientific, Waltham, MA, U.S.A.) at 40  $\mu$ m per section. The sections were first  
97 incubated in 3% H<sub>2</sub>O<sub>2</sub> to block endogenous peroxidase activity. After washing with  
98 0.02 M KPBS (pH = 7.0), the sections were blocked in 5% (w/v) skim milk for 1 hour  
99 at room temperature. Then, the sections were incubated in 5% skim milk containing the  
100 primary antibody overnight at 4 °C. Immunohistochemistry was conducted on brain  
101 sections from female *Akt1*<sup>-/-</sup> mice (n = 6) and female WT littermates (n = 8) to detect  
102 two major subtypes of GABAergic interneurons using antibodies against parvalbumin  
103 (1:1500, Sigma-Aldrich) and calretinin (1:2000, EMD Millipore). After incubation in  
104 the appropriate secondary antibodies, bound antibodies were detected using DAB  
105 substrate (D5905, Sigma-Aldrich) and a Vectastain ABC kit (PK-6100, Vector  
106 Laboratories, Burlingame, CA, U.S.A.). Neuronal density was measured in subregions  
107 of the hippocampus (CA1 and CA3 areas) and the cortex (anterior cingulate cortex area  
108 1 (aCg1), prelimbic cortex (PrL), infralimbic cortex (IL), primary motor cortex (M1),  
109 and primary auditory cortex (Au1)) using NIH ImageJ software.

110 ***Experiment 3b: Examination of functional GABA<sub>A</sub>R expression in the target***  
111 ***brain areas of female mice.*** The expression of GABA<sub>A</sub>Rs was examined in the brains  
112 of adult female *Akt1*<sup>-/-</sup> and WT mice (n = 5 each) using Western blotting. Brain regions  
113 including the hippocampus, whole cortex, and striatum were rapidly dissected, frozen  
114 in liquid nitrogen, and stored at -80 °C until protein extraction. Tissue samples were

115 homogenized in a commercial permeabilization buffer (ProteoJET™ Membrane  
116 Protein Extraction Kit, K0321, Fermentas) containing Protease Inhibitor Cocktail  
117 tablets (Roche) and Phosphatase Inhibitor Cocktail 1 (Sigma-Aldrich), and the mixture  
118 was then incubated for 10 min at 4 °C with continuous rocking. Afterwards, the mixture  
119 was centrifuged at 16,000 g at 4 °C for 15 min. The supernatant, containing cytoplasmic  
120 proteins, was carefully collected for subsequent analysis. The cell debris was placed on  
121 ice and treated with a commercial membrane protein extraction buffer. The debris was  
122 homogenized, and the mixture was then shaken at 1400 rpm for 30 min at 4 °C.  
123 Afterwards, the mixture was centrifuged at 16,000 g at 4 °C for 15 min. The supernatant  
124 was collected, and the protein concentration was measured using the Bradford protein  
125 assay (Bio-Rad Laboratories) via spectrometry at 620 nm. Equal amounts of protein  
126 were separated via 10% sodium dodecyl sulfate/polyacrylamide gel electrophoresis  
127 (SDS/PAGE) and transferred onto nitrocellulose membranes (EMD Millipore) in  
128 transfer buffer containing 20% methanol. Following protein transfer, the membranes  
129 were washed in Tris-buffered saline containing 0.1% Tween-20 (TBST) and blocked in  
130 5% skim milk for 1 hour at room temperature. Similar to Experiment 1, the membranes  
131 were incubated in 5% skim milk containing a mouse anti-  $\beta 2$  GABA<sub>A</sub>R subunit  
132 antibody (1:1000, EMD Millipore) as the primary antibody and a rabbit anti-Na<sup>+</sup>/K<sup>+</sup>  
133 ATPase antibody (1:1000, Cell Signaling Technology) as the loading control for

134 membrane protein. Appropriate HRP-conjugated antibodies were used as secondary  
135 antibodies. Bound antibodies were detected using an enhanced chemiluminescence kit  
136 (EMD Millipore) and blue sensitive universal film (Fujifilm). Densitometric analysis  
137 was performed using NIH ImageJ software.

138

139 **Experiment 4: Examination of the morphological features of hippocampal**  
140 **pyramidal neurons in female *Akt1*<sup>-/-</sup> mice and female WT littermate controls.**

141 Based on the findings from Experiments 2 and 3, the morphological properties of  
142 hippocampal neurons were examined in adult female *Akt1*<sup>-/-</sup> mice and WT littermate  
143 controls. Because pyramidal neurons of the hippocampal CA1 region are critical for the  
144 afferent and efferent connections of the hippocampus, a transgenic C57BL6-Tg (GFPm)  
145 mouse line expressing green fluorescent protein (GFP) driven by the Thy1 promoter  
146 was selected and used for morphometric analysis of GFP-labelled CA1 pyramidal  
147 neurons in the hippocampus<sup>7</sup>. The expression patterns of GFP-labelled pyramidal  
148 neurons in the Thy1-C57BL6-Tg (GFPm) transgenic mouse line have been reported  
149 previously<sup>7</sup>, and this mouse line has been successfully used to analyse the  
150 morphological alterations in pyramidal neurons of mutant mice. Additional female  
151 mice generated from *Akt1*<sup>+/-</sup> breeding pairs in the C57BL6-Tg (GFPm) background  
152 were used in this experiment. Adult mice were anaesthetized and transcardially



153 perfused with PBS followed by 4% PFA in PBS. Fixed brains were sectioned coronally  
154 using a vibratome. Serial coronal sections (150  $\mu\text{m}$  in thickness) were collected and  
155 mounted on slides for immunofluorescence. Confocal stack images of GFP-labelled  
156 neurons were obtained at intervals of 0.4  $\mu\text{m}$  using 20x, 40x-oil and 63x-oil objectives  
157 on a Leica TCS SP5 confocal microscopy system (Leica, Wetzlar, Germany).  
158 Neurolucida software (Microbrightfield Inc., Williston, VT, U.S.A.) was used to trace  
159 and reconstruct the neurons in 3 dimensions. GFP labelling was nearly exclusively  
160 restricted to the cell bodies and dendritic trees of CA1 pyramidal neurons of both *Akt1*<sup>-/-</sup>  
161 and WT mice. Using Neurolucida software, morphometric analyses of the GFP-  
162 labelled pyramidal neurons (1.46 to 2.30 mm posterior to Bregma) of adult female *Akt1*<sup>-/-</sup>  
163 (n = 13) and WT littermate controls (n = 11) were performed to detect the  
164 neuromorphological differences between genotypes. The following 10 morphological  
165 variables were selected for analysis based on previous studies<sup>2,8</sup>: (1) the number of  
166 branches from the apical branches; (2) the number of apical tips; (3) the total length of  
167 the apical tuft, which was calculated as the sum of the lengths of the apical stem and  
168 the branches that formed the tuft; (4) the soma size (obtained by outlining the cell somas  
169 and automatically calculating the pixel areas in  $\mu\text{m}^2$ ); (5) the number of primary basal  
170 dendrites (excluding apical dendrites and axons); (6) the total length of the primary  
171 basal dendrites; (7) the number of branches from the basal branches; (8) the number of

172 basal tips; (9) the total length of the basal dendrites; and (10) basal dendritic complexity  
173 based on Sholl analysis.

174

175 **Experiment 5: Recording of neuronal oscillations in the hippocampus of female**  
176 ***Akt1*<sup>-/-</sup> mice and their WT littermate controls.**

177 *Stereotaxic brain surgery and histology:* The mice were initially anaesthetized  
178 with a small dose of isoflurane (5%) administered in an induction chamber. The mice  
179 were then placed in a stereotaxic frame such that the nose was in the anaesthesia head-  
180 holder supplying isoflurane in O<sub>2</sub> (at ~0.5 to 1 L/min). The initial isoflurane levels after  
181 induction of anaesthesia were as high as 2%, and the isoflurane level was lowered over  
182 the course of surgery to ~1% when the animal reached a stable plane of anaesthesia. An  
183 adequate depth of anaesthesia was verified based on the absence of the toe-pinch reflex.  
184 Then, the scalp was shaved and cleaned with Betadine and 70% ethanol before incision.  
185 Using a fresh scalpel blade, a single incision through the skin was made. A single burr-  
186 hole in the skull at the target site (CA1 area: AP: -1.8 mm; ML: 1.5 mm) was produced  
187 using a drill. The dura was opened slightly, and the electrode array was implanted into  
188 the brain tissue at the desired angle and depth (DV: 1.5 mm) by slowly lowering the  
189 device. A stainless steel screw driven into the skull above the cerebellum, served as  
190 ground. After the completion of implantation, the animal was allowed to fully recover  
191 in a clean cage supplied with a heating blanket. Each mouse received an analgesic agent

192 (e.g., ibuprofen) for a few days after surgery. At least 7 days after recovery, neural  
193 oscillations were recorded in female *Akt1*<sup>-/-</sup> mice and WT littermate controls (n = 5 each)  
194 anesthetized using isoflurane (1%). One day after completion of the neural recordings,  
195 electrode placement was confirmed post-mortem after perfusion and fixation with 4%  
196 PFA and 1% potassium ferrocyanide, followed by Prussian blue staining in 40- $\mu$ m  
197 coronal sections.

198

199 **Experiment 6: Examination of hippocampus-related cognitive function in female**  
200 ***Akt1*<sup>-/-</sup> mice and female WT littermate controls.**

201 Based on the findings from Experiments 3-5, hippocampus-related cognitive  
202 functions were evaluated using the Y-maze (Experiment 6a) and Morris water maze  
203 tasks (Experiment 6b).

204 ***Experiment 6a: The Y-maze test.*** Spatial memory retention was examined in naïve  
205 female adult *Akt1*<sup>-/-</sup> mice and WT littermates (n = 8 each) using a polypropylene Y-maze  
206 (with three equally spaced arms (50 cm long, 12 cm wide, 16 cm height)) surrounded  
207 by visual cues. The Y-maze test consisted of a 10-min training trial and a 5-min  
208 retention trial separated by a one-hour inter-trial interval to assess spatial recognition  
209 memory. In the training trial, each mouse was allowed to explore only two arms (the  
210 starting arm and another arm) of the maze, with the third arm (the novel arm) blocked.

211 In the retention trial, each mouse was free to explore all three arms. The distance  
212 travelled and time spent in each arm (excluding the central zone of the Y) were recorded  
213 and analysed using an EthoVision tracking system (Noldus Information Technology,  
214 Wageningen, Netherlands). Two indexes were calculated for the retention trial: (1) the  
215 percentage (%) of time spent in the novel arm = time spent in the novel arm / total time  
216 spent in any arm; and (2) the percentage (%) of distance travelled in the novel arm =  
217 distance travelled in the novel arm / total distance travelled in any arm.

218 ***Experiment 6b: The Morris water maze test.*** Spatial learning and memory  
219 abilities were evaluated using a standard spatial version of the Morris water maze task.  
220 A circular pool (diameter, 100 cm) filled with water that had been clouded with nontoxic  
221 white paint and that was held at  $22 \pm 1$  °C was placed in the centre of the testing room  
222 and surrounded by several visual cues. A platform (12×12 cm<sup>2</sup>) was hidden 1 cm  
223 beneath the surface of the water. The swim paths of each subject were recorded using  
224 an EthoVision tracking system (Noldus Information Technology). Each mouse  
225 performed 6 trials per day with inter-trial intervals of 11-15 minutes for 8 consecutive  
226 acquisition days. On each daily trial, each mouse started from a quadrant that was  
227 pseudorandomly selected from the three quadrants that did not contain the platform.  
228 Mice that failed to locate the platform within 1 min were gently guided to the platform,  
229 where they remained for 30 sec before being returned to their cages. The escape latency

230 (sec), measured as the time required to reach the hidden platform, and the path length  
231 (cm) were recorded. After 8 days of training, the platform was removed from the pool,  
232 and each subject was returned to the pool lacking a platform for a 1-min probe test on  
233 Day 9. The time spent swimming and the swimming distance in each quadrant were  
234 recorded and used as an index of reference memory ability. One day after the probe test,  
235 each mouse was retrained in the reversal version of the Morris water maze task, in  
236 which the hidden platform was relocated to the quadrant opposite the original target  
237 quadrant for 5 consecutive days to test reversal learning.

238

239 **References:**

- 240 1 Lai, W. S. *et al.* Akt1 deficiency affects neuronal morphology and predisposes  
241 to abnormalities in prefrontal cortex functioning. *Proceedings of the National*  
242 *Academy of Sciences of the United States of America* **103**, 16906-16911,  
243 doi:10.1073/pnas.0604994103 (2006).
- 244 2 Chen, Y. W. & Lai, W. S. Behavioral phenotyping of v-akt murine thymoma  
245 viral oncogene homolog 1-deficient mice reveals a sex-specific prepulse  
246 inhibition deficit in females that can be partially alleviated by glycogen  
247 synthase kinase-3 inhibitors but not by antipsychotics. *Neuroscience* **174**, 178-  
248 189, doi:10.1016/j.neuroscience.2010.09.056 (2011).

249 3 Cho, H., Thorvaldsen, J. L., Chu, Q., Feng, F. & Birnbaum, M. J.  
250 Akt1/PKBalpha is required for normal growth but dispensable for  
251 maintenance of glucose homeostasis in mice. *J Biol Chem* **276**, 38349-38352,  
252 doi:10.1074/jbc.C100462200 (2001).

253 4 Lin, Y. T. *et al.* YAP regulates neuronal differentiation through Sonic  
254 hedgehog signaling pathway. *Exp Cell Res* **318**, 1877-1888,  
255 doi:10.1016/j.yexcr.2012.05.005 (2012).

256 5 Wan, Q. *et al.* Recruitment of functional GABA(A) receptors to postsynaptic  
257 domains by insulin. *Nature* **388**, 686-690, doi:10.1038/41792 (1997).

258 6 Wang, Q. *et al.* Control of synaptic strength, a novel function of Akt. *Neuron*  
259 **38**, 915-928 (2003).

260 7 Feng, G. *et al.* Imaging neuronal subsets in transgenic mice expressing  
261 multiple spectral variants of GFP. *Neuron* **28**, 41-51 (2000).

262 8 Pei, J. C., Liu, C. M. & Lai, W. S. Distinct phenotypes of new transmembrane-  
263 domain neuregulin 1 mutant mice and the rescue effects of valproate on the  
264 observed schizophrenia-related cognitive deficits. *Front Behav Neurosci* **8**,  
265 126, doi:10.3389/fnbeh.2014.00126 (2014).

266

267 **Figure legends for Supplementary Figures**

268 **Figure S1. Representative images for Figure 1a. The effect of Akt1/2 inhibitor**

269 **application on neuronal differentiation from P19 cells was examined using**

270 **immunocytochemistry.** P19 cells were transfected with US2 (control plasmid for

271 transfection) and Ascl1 (inducer of neuronal differentiation). During neuronal

272 differentiation, P19 cells were treated with the vehicle control (Vehicle) or the Akt

273 inhibitor (Akt1/2 inhibitor). At DIV 5, P19 cells were stained for Tuj1 (neuronal

274 marker, red) and GFP (transfection marker, green).

275

276 **Figure S2. Representative images for Figure 1b. The effect of Akt1/2 inhibitor**

277 **application on the differentiation of GABAergic neurons from P19 cells was**

278 **examined using immunocytochemistry.** After treatment with an Akt1/2 inhibitor

279 during neuronal differentiation, P19 cells were stained for GAD67 (GABAergic

280 neuronal marker, red) and GFP (transfection marker, green) at DIV 5.

281

282 **Figure S3. Representative images for Figure 1c. The effect of Akt1/2 inhibitor**

283 **application on the differentiation of parvalbumin-positive neurons from P19 cells**

284 **was examined using immunocytochemistry.** After treatment with an Akt1/2

285 inhibitor during neuronal differentiation, P19 cells were stained for parvalbumin (PV;

286 red) and GFP (transfection marker, green) at DIV 5.

287

288

289 **Supplementary Figures S1, S2, & S3**



# US2

# Ascl1

Vehicle

Inhibitbor

Vehicle

Inhibitbor

GFP

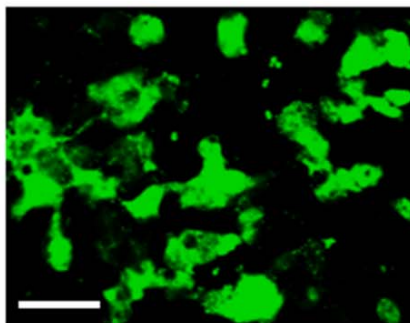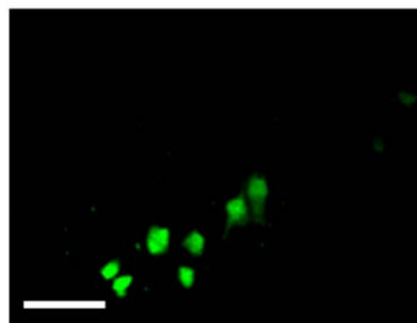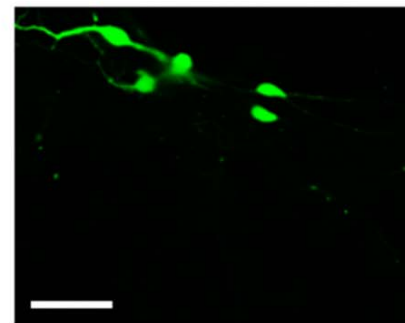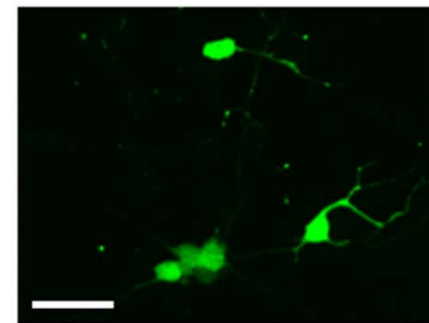

Tuj1

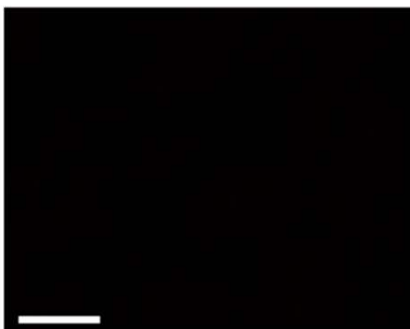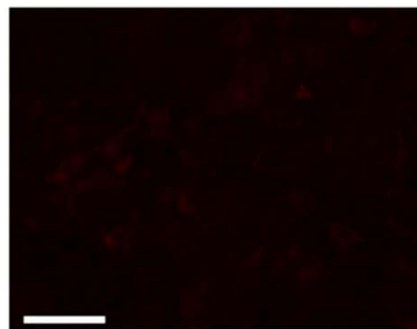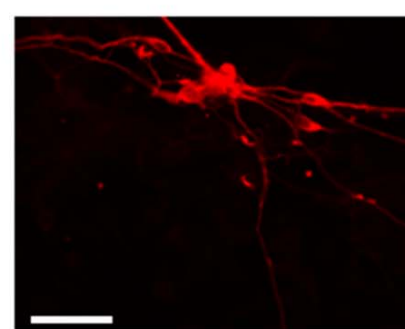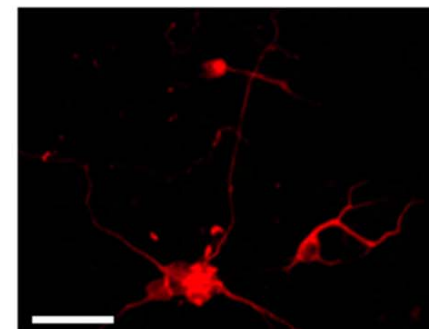

GFP  
+  
Tuj1

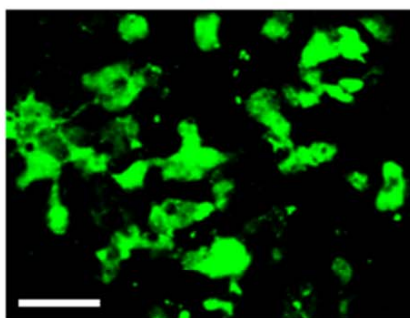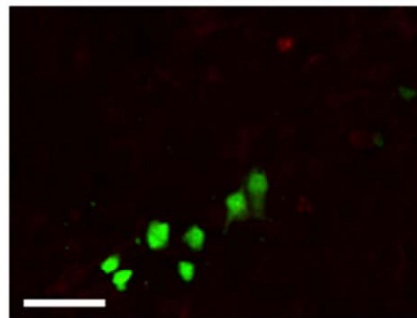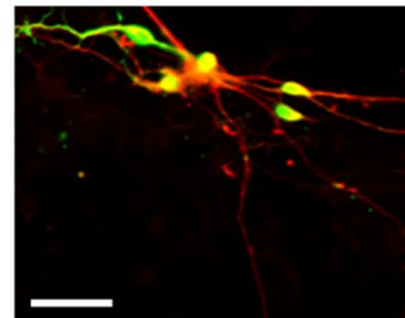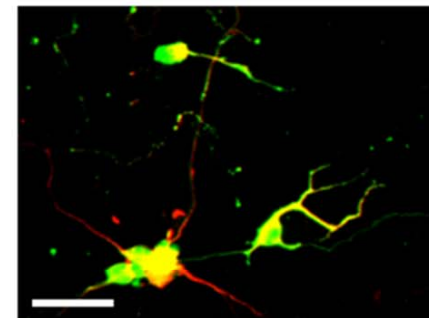

Scale bar: 30μm

# Ascl1

Vehicle

AKT inhibitor

GFP

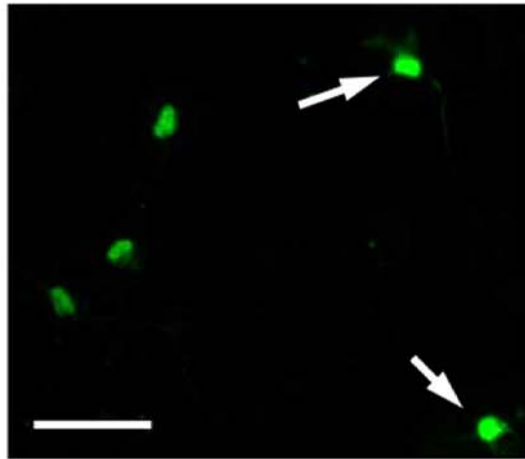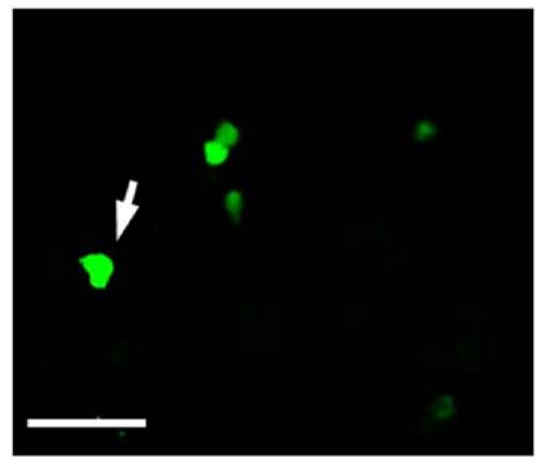

GAD67

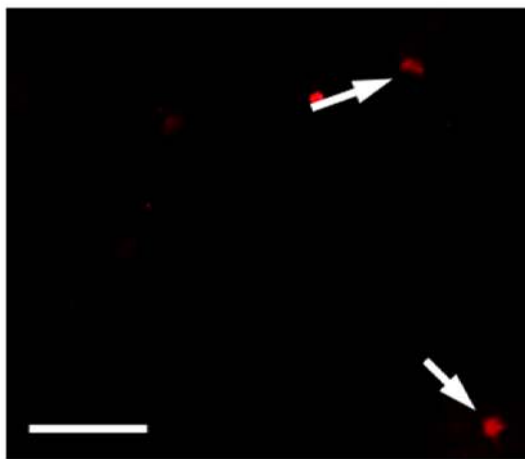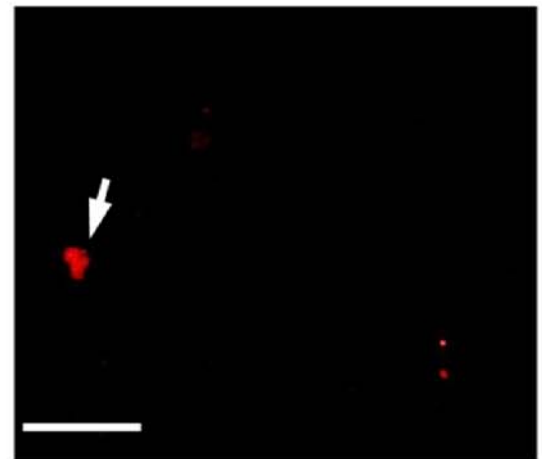

GFP

+

GAD67

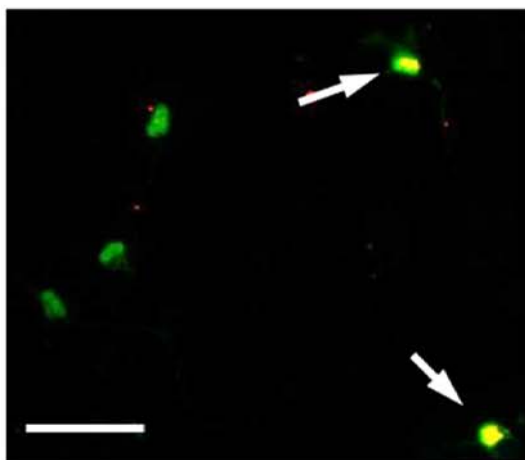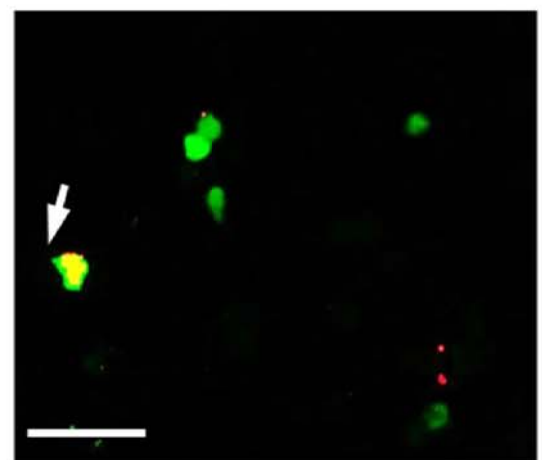

Scale bar: 30μm

# Ascl1

Vehicle

AKT inhibitor

GFP

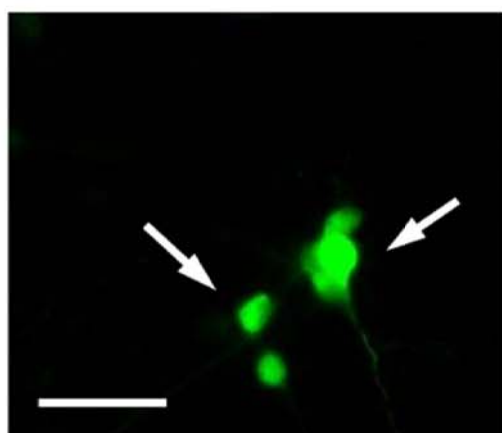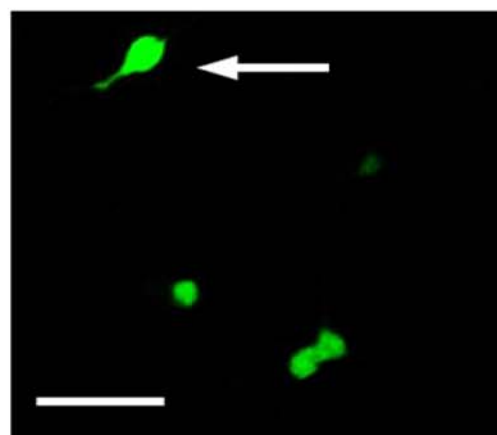

PV

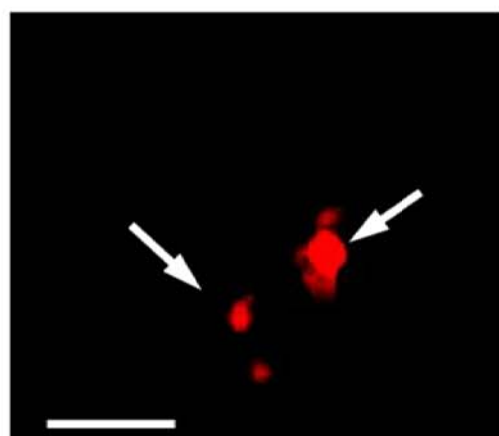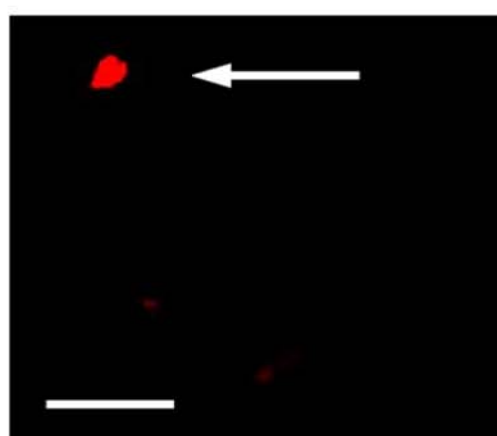

GFP

+

PV

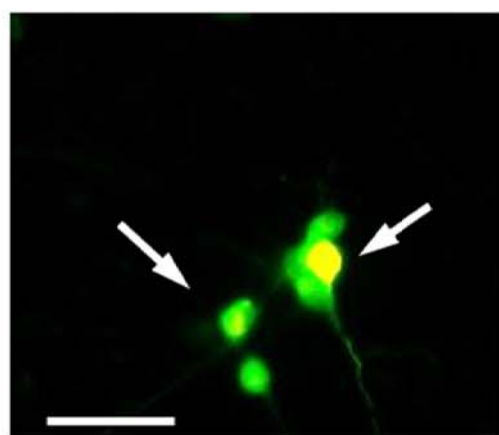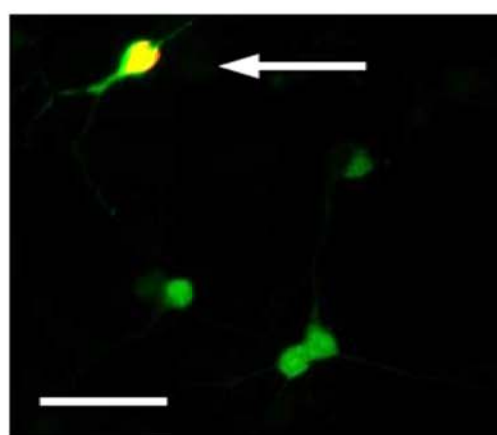

Scale bar: 30µm
